# Supplementary material for: Differences in carbon source utilisation distinguish Campylobacter jejuni from Campylobacter coli
Source: PubMed Central journal article supplement (PMC4219013; doi:10.1186/s12866-014-0262-y), 2014-10-28
Supplement: 12866_2014_262_MOESM2_ESM.pdf [file 12866_2014_262_MOESM2_ESM.pdf]

## A: 2-methyl citrate synthase

K7 1 mwiseatkkttgglagviaggqsaictcglnglnnyygyseelaqnaefeeiayllqfqlpnakelenykekiaqraisenknvkaipkevhpnnmqtaavaalgalegenedsdqdekiirllqilpsmloywhhyvfgkeidf  
 RM2228 1 mwiseatkkttgglagviaggqsaictcglnglnnyygyseelaqnaefeeiayllqfqlpnakelenykekiaqraisenknvkaipkevhpnnmqtaavaalgalegenedsdqdekiirllqilpsmloywhhyvfgkeidf  
 JV20 1 mwiseatkkttgglagviaggqsaictcglnglnnyygyseelaqnaefeeiayllqfqlpnakelenykekiaqraisenknvkaipkevhpnnmqtaavaalgalegenedsdqdekiirllqilpsmloywhhyvfgkeidf  
 Z163 1 mwiseatkkttgglagviaggqsaictcglnglnnyygyseelaqnaefeeiayllqfqlpnakelenykekiaqraisenknvkaipkevhpnnmqtaavaalgalegenedsdqdekiirllqilpsmloywhhyvfgkeidf  
 90-3 1 mwiseatkkttgglagviaggqsaictcglnglnnyygyseelaqnaefeeiayllqfqlpnakelenykekiaqraisenknvkaipkevhpnnmqtaavaalgalegenedsdqdekiirllqilpsmloywhhyvfgkeidf  
 2548 1 mwiseatkkttgglagviaggqsaictcglnglnnyygyseelaqnaefeeiayllqfqlpnakelenykekiaqraisenknvkaipkevhpnnmqtaavaalgalegenedsdqdekiirllqilpsmloywhhyvfgkeidf

K7 151 dsnqtsiagyflekikkleapkedfikamqcsililyaehefnastftaricacstkedifsavaaaigalrqlphgganeasahlieesfksvedaiegvnkklennkellmgfghrvyglgqdpnalikvskhlgqddllfkiseaiealm  
 RM2228 151 dsnqtsiagyflekikkleapkedfikamqcsililyaehefnastftaricacstkedifsavaaaigalrqlphgganeasahlieesfksvedaiegvnkklennkellmgfghrvyglgqdpnalikvskhlgqddllfkiseaiealm  
 JV20 151 dsnqtsiagyflekikkleapkedfikamqcsililyaehefnastftaricacstkedifsavaaaigalrqlphgganeasahlieesfksvedaiegvnkklennkellmgfghrvyglgqdpnalikvskhlgqddllfkiseaiealm  
 Z163 151 dsnqtsiagyflekikkleapkedfikamqcsililyaehefnastftaricacstkedifsavaaaigalrqlphgganeasahlieesfksvedaiegvnkklennkellmgfghrvyglgqdpnalikvskhlgqddllfkiseaiealm  
 90-3 151 dsnqtsiagyflekikkleapkedfikamqcsililyaehefnastftaricacstkedifsavaaaigalrqlphgganeasahlieesfksvedaiegvnkklennkellmgfghrvyglgqdpnalikvskhlgqddllfkiseaiealm  
 2548 151 dsnqtsiagyflekikkleapkedfikamqcsililyaehefnastftaricacstkedifsavaaaigalrqlphgganeasahlieesfksvedaiegvnkklennkellmgfghrvyglgqdpnalikvskhlgqddllfkiseaiealm

K7 301 kekrlpnpnadfyasaayhfmqipteyftpfifimervsgwcahikeqrannkllirpseeiygveprkfvkiqdr  
 RM2228 301 kekrlpnpnadfyasaayhfmqipteyftpfifimervsgwcahikeqrannkllirpseeiygveprkfvkiqdr  
 JV20 301 kekrlpnpnadfyasaayhfmqipteyftpfifimervsgwcahikeqrannkllirpseeiygveprkfvkiqdr  
 Z163 301 kekrlpnpnadfyasaayhfmqipteyftpfifimervsgwcahikeqrannkllirpseeiygveprkfvkiqdr  
 90-3 301 kekrlpnpnadfyasaayhfmqipteyftpfifimervsgwcahikeqrannkllirpseeiygveprkfvkiqdr  
 2548 301 kekrlpnpnadfyasaayhfmqipteyftpfifimervsgwcahikeqrannkllirpseeiygveprkfvkiqdr

## B: propionate CoA ligase

K7 1 -----mgivyeqytyreslqnpeafwaaakkvhwynedrvlddsdqhyrxfvfggcmntcynaldihvhngrgdqlaliydsptvtdkkytykqlrdrvakvagilankgvvkgdrvviympripealianlacarlgaihsv  
 RM2228 1 -----mgivyeqytyreslqnpeafwaaakkvhwynedrvlddsdqhyrxfvfggcmntcynaldihvhngrgdqlaliydsptvtdkkytykqlrdrvakvagilankgvvkgdrvviympripealianlacarlgaihsv  
 90-3 1 -----mgivyeqytyreslqnpeafwaaakkvhwynedrvlddsdqhyrxfvfggcmntcynaldihvhngrgdqlaliydsptvtdkkytykqlrdrvakvagilankgvvkgdrvviympripealianlacarlgaihsv  
 2548 1 -----mgivyeqytyreslqnpeafwaaakkvhwynedrvlddsdqhyrxfvfggcmntcynaldihvhngrgdqlaliydsptvtdkkytykqlrdrvakvagilankgvvkgdrvviympripealianlacarlgaihsv  
 JV20 1 mgiiqlikkwmgivyeqytyreslqnpeafwaaakkvhwynedrvlddsdqhyrxfvfggcmntcynaldihvhngrgdqlaliydsptvtdkkytykqlrdrvakvagilankgvvkgdrvviympripealianlacarlgaihsv  
 Z163 1 -----mgivyeqytyreslqnpeafwaaakkvhwynedrvlddsdqhyrxfvfggcmntcynaldihvhngrgdqlaliydsptvtdkkytykqlrdrvakvagilankgvvkgdrvviympripealianlacarlgaihsv

K7 140 vfggfaahelatriedakprmiiasasogievssieykpildeaikkcthkpttcliwqrppqyanmlpwrddidweleeeektrgvdpvplvlatdplyilytsgttgspkqvirsngghsvamkwmdniynakagdvfftaadvqvvvgh  
 RM2228 140 vfggfaahelatriedakprmiiasasogievssieykpildeaikkcthkpttcliwqrppqyanmlpwrddidweleeeektrgvdpvplvlatdplyilytsgttgspkqvirsngghsvamkwmdniynakagdvfftaadvqvvvgh  
 90-3 140 vfggfaahelatriedakprmiiasasogievssieykpildeaikkcthkpttcliwqrppqyanmlpwrddidweleeeektrgvdpvplvlatdplyilytsgttgspkqvirsngghsvamkwmdniynakagdvfftaadvqvvvgh  
 2548 140 vfggfaahelatriedakprmiiasasogievssieykpildeaikkcthkpttcliwqrppqyanmlpwrddidweleeeektrgvdpvplvlatdplyilytsgttgspkqvirsngghsvamkwmdniynakagdvfftaadvqvvvgh  
 JV20 151 vfggfaahelatriedakprmiiasasogievssieykpildeaikkcthkpttcliwqrppqyanmlpwrddidweleeeektrgvdpvplvlatdplyilytsgttgspkqvirsngghsvamkwmdniynakagdvfftaadvqvvvgh  
 Z163 140 vfggfaahelatriedakprmiiasasogievssieykpildeaikkcthkpttcliwqrppqyanmlpwrddidweleeeektrgvdpvplvlatdplyilytsgttgspkqvirsngghsvamkwmdniynakagdvfftaadvqvvvgh

K7 290 syivypalmngottivyeqkpvrtppnsafwriieeykvnvlfasaptafraikkedpkgewikkfnldslrsifvagerodsdtlkwiekltkkpvldnwwqtetgwaiaanplgleaqqvkaqsptkmpgfnlklvdekgqelgaqkk  
 RM2228 290 syivypalmngottivyeqkpvrtppnsafwriieeykvnvlfasaptafraikkedpkgewikkfnldslrsifvagerodsdtlkwiekltkkpvldnwwqtetgwaiaanplgleaqqvkaqsptkmpgfnlklvdekgqelgaqkk  
 90-3 290 syivypalmngottivyeqkpvrtppnsafwriieeykvnvlfasaptafraikkedpkgewikkfnldslrsifvagerodsdtlkwiekltkkpvldnwwqtetgwaiaanplgleaqqvkaqsptkmpgfnlklvdekgqelgaqkk  
 2548 290 syivypalmngottivyeqkpvrtppnsafwriieeykvnvlfasaptafraikkedpkgewikkfnldslrsifvagerodsdtlkwiekltkkpvldnwwqtetgwaiaanplgleaqqvkaqsptkmpgfnlklvdekgqelgaqkk  
 JV20 301 syivypalmngottivyeqkpvrtppnsafwriieeykvnvlfasaptafraikkedpkgewikkfnldslrsifvagerodsdtlkwiekltkkpvldnwwqtetgwaiaanplgleaqqvkaqsptkmpgfnlklvdekgqelgaqkk  
 Z163 290 syivypalmngottivyeqkpvrtppnsafwriieeykvnvlfasaptafraikkedpkgewikkfnldslrsifvagerodsdtlkwiekltkkpvldnwwqtetgwaiaanplgleaqqvkaqsptkmpgfnlklvdekgqelgaqkk

K7 440 gilclklplppaclmgwiwenderyrroyldqfpgyytqtdtgyidkdggyvylgrndgiiinvaghrletgseeiiakhpdvaeacavignvdelkgeipmgfivlkegierdhrgivegvvalvrqeigavaafskiatvvaalpkrsgk  
 RM2228 440 gilclklplppaclmgwiwenderyrroyldqfpgyytqtdtgyidkdggyvylgrndgiiinvaghrletgseeiiakhpdvaeacavignvdelkgeipmgfivlkegierdhrgivegvvalvrqeigavaafskiatvvaalpkrsgk  
 90-3 440 gilclklplppaclmgwiwenderyrroyldqfpgyytqtdtgyidkdggyvylgrndgiiinvaghrletgseeiiakhpdvaeacavignvdelkgeipmgfivlkegierdhrgivegvvalvrqeigavaafskiatvvaalpkrsgk  
 2548 440 gilclklplppaclmgwiwenderyrroyldqfpgyytqtdtgyidkdggyvylgrndgiiinvaghrletgseeiiakhpdvaeacavignvdelkgeipmgfivlkegierdhrgivegvvalvrqeigavaafskiatvvaalpkrsgk  
 JV20 441 gilclklplppaclmgwiwenderyrroyldqfpgyytqtdtgyidkdggyvylgrndgiiinvaghrletgseeiiakhpdvaeacavignvdelkgeipmgfivlkegierdhrgivegvvalvrqeigavaafskiatvvaalpkrsgk  
 Z163 440 gilclklplppaclmgwiwenderyrroyldqfpgyytqtdtgyidkdggyvylgrndgiiinvaghrletgseeiiakhpdvaeacavignvdelkgeipmgfivlkegierdhrgivegvvalvrqeigavaafskiatvvaalpkrsgk

K7 590 iirknlreiadgstlnvpatiedensvlkacekainalgypkknkgek  
 RM2228 590 iirknlreiadgstlnvpatiedensvlkacekainalgypkknkgek  
 90-3 590 iirknlreiadgstlnvpatiedensvlkacekainalgypkknkgek  
 2548 590 iirknlreiadgstlnvpatiedensvlkacekainalgypkknkgek  
 JV20 601 iirknlreiadgstlnvpatiedensvlkacekainalgypkknkgek  
 Z163 590 iirknlreiadgstlnvpatiedensvlkacekainalgypkknkgek
